# Supplementary material
Source: publisher figshare collection journal article supplement (https://frontiersin.figshare.com/ndownloader/files/28106934)
Supplement: Supplementary file [file 28106934]

| Scenario Development          |                                                                                                                                                               |
|-------------------------------|---------------------------------------------------------------------------------------------------------------------------------------------------------------|
| Date of Development:          | December 2019 / January 2020                                                                                                                                  |
| Scenario Developer(s):        | Bosco G, Paganini M, Mormando G, Garetto G                                                                                                                    |
| Affiliations/Institutions(s): | Department of Biomedical Sciences (DSB) and Department of Medicine, University of Padova (Padova, Italy);<br>ATIP Hyperbaric Treatment Center (Padova, Italy) |
| Contact E-mail:               | simulazione.dimed@unipd.it                                                                                                                                    |
| Last Revision Date:           | January 31st, 2020                                                                                                                                            |
| Revised By:                   | Fabris F, Camporesi M                                                                                                                                         |
| Version Number:               | 1.0                                                                                                                                                           |

## List of abbreviations

ATA: atmospheres absolute

BP: Blood Pressure

CRM: crisis resource management

GCS: Glasgow Coma Scale

HBOT: Hyperbaric Oxygen Therapy

HR: Heart Rate

O<sub>2</sub>: oxygen

PNX: Pneumothorax

RR: Respiratory Rate

## Case Summary 01: A shaky decompression

|                            |                                                                                                                                                                                   |
|----------------------------|-----------------------------------------------------------------------------------------------------------------------------------------------------------------------------------|
| <b>Scenario Title:</b>     | <b>A shaky decompression</b>                                                                                                                                                      |
| Keywords:                  | hyperbaric medicine, seizure, hyperoxia, multiplace hyperbaric chamber                                                                                                            |
| Brief Description of Case: | A patient treated in a multiplace hyperbaric chamber for femoral head necrosis has a seizure due to hyperoxia. Learners should stop oxygen and assist the critically ill patient. |

| Goals and Objectives |                                                                                                                                                                 |
|----------------------|-----------------------------------------------------------------------------------------------------------------------------------------------------------------|
| Educational Goal:    | Management of a complication due to hyperoxia in the hyperbaric chamber.                                                                                        |
| Medical objectives:  | <ul style="list-style-type: none"> <li>• Recognize condition</li> <li>• Stop O2 flow / restore room air in the chamber</li> <li>• Slow decompression</li> </ul> |
| No CRM objectives    |                                                                                                                                                                 |

| Learners, Setting and Personnel |                                          |          |                              |                      |
|---------------------------------|------------------------------------------|----------|------------------------------|----------------------|
| Target Learners:                | <input type="checkbox"/> Junior Learners |          | x Senior Learners            | x Staff              |
|                                 | x Physicians                             | x Nurses | <input type="checkbox"/> RTS | x Inter-professional |

|                                     |                                                                                             |           |                                 |
|-------------------------------------|---------------------------------------------------------------------------------------------|-----------|---------------------------------|
|                                     | x Other Learners: Trainees in Diving and Hyperbaric Medicine                                |           |                                 |
| Location:                           | <input type="checkbox"/> Sim Lab                                                            | x In Situ | <input type="checkbox"/> Other: |
| Recommended Number of Facilitators: | Instructors: 2                                                                              |           |                                 |
|                                     | Confederates: 1 hyperbaric technician (outside); 1 patient and 1 facilitator in the chamber |           |                                 |
|                                     | Sim Techs: 1                                                                                |           |                                 |

#### Initial Patient Information

| Patient Chart                                                                                            |                                  |           |            |
|----------------------------------------------------------------------------------------------------------|----------------------------------|-----------|------------|
| Patient Name: Paolo                                                                                      | Age: 65                          | Gender: M | Weight: 72 |
| No monitor in the multiplace hyperbaric chamber, patient alert, collaborating, not pale, not tachypneic. |                                  |           |            |
| Allergies: none                                                                                          |                                  |           |            |
| Past Medical History: femoral head necrosis                                                              | Current Medications: painkillers |           |            |

### Extra Patient Information

| Physical Exam  |                                                                                                                                                                                                         |
|----------------|---------------------------------------------------------------------------------------------------------------------------------------------------------------------------------------------------------|
| Cardio: normal | Neuro: initially asymptomatic; after virtual 30 minutes (reality: 2 minutes), the patient says feeling "like numbness" in the fingers<br><br>Then loss of consciousness and generalized clonic seizure. |
| Resp: normal   | Head & Neck: normal, no trauma                                                                                                                                                                          |
| Abdo: normal   | MSK/skin: clony                                                                                                                                                                                         |
| Other: /       |                                                                                                                                                                                                         |

### Technical Requirements/Room Vision

| Patient                                                                                       |
|-----------------------------------------------------------------------------------------------|
| <input type="checkbox"/> Mannequin ( <i>specify the type and whether infant/child/adult</i> ) |
| X Standardized Patient                                                                        |
| <input type="checkbox"/> Task Trainer                                                         |
| <input type="checkbox"/> Hybrid                                                               |

| Special Equipment Required, Required Medications, Moulage                                                                                                                                                                                                                                                                                                                                                                                                                                                                                                                                                                                                                                                                                                                                                                                                                                                                                                                                                                                                        |
|------------------------------------------------------------------------------------------------------------------------------------------------------------------------------------------------------------------------------------------------------------------------------------------------------------------------------------------------------------------------------------------------------------------------------------------------------------------------------------------------------------------------------------------------------------------------------------------------------------------------------------------------------------------------------------------------------------------------------------------------------------------------------------------------------------------------------------------------------------------------------------------------------------------------------------------------------------------------------------------------------------------------------------------------------------------|
| None                                                                                                                                                                                                                                                                                                                                                                                                                                                                                                                                                                                                                                                                                                                                                                                                                                                                                                                                                                                                                                                             |
| Monitors at Case Onset                                                                                                                                                                                                                                                                                                                                                                                                                                                                                                                                                                                                                                                                                                                                                                                                                                                                                                                                                                                                                                           |
| <input type="checkbox"/> Patient on a monitor with vitals displayed<br><input checked="" type="checkbox"/> Patient not yet on a monitor                                                                                                                                                                                                                                                                                                                                                                                                                                                                                                                                                                                                                                                                                                                                                                                                                                                                                                                          |
| Patient Reactions and Exam                                                                                                                                                                                                                                                                                                                                                                                                                                                                                                                                                                                                                                                                                                                                                                                                                                                                                                                                                                                                                                       |
| <ul style="list-style-type: none"><li>• Routinary HBOT session.</li><li>• Patient has already undergone HBOT, and this is the 4th consecutive session.</li><li>• Chamber reaches target depth (2.4 ATA), oxygen starts.</li><li>• Presenting complaint: initially asymptomatic; after virtual 30 minutes (reality: 2 minutes), the patient says feeling like numbness in the fingers.</li><li>• Then loss of consciousness and generalized clonic seizure.</li><li>• Trainees suspect hyperoxic seizure, put the patient on the floor, remove oxygen mask, check carotid pulse, and call the technician outside asking to restore ambient air concentrations inside the chamber.</li><li>• Cessation of seizures after 1 minute; patient still unconscious, breathing heavily</li><li>• Trainees asks the technician to slowly decompress chamber to surface (to avoid PNX)</li><li>• While decompressing, the patient progressively regains consciousness (Pain then Verbal)</li><li>• The patient is carried outside, parameters measured, now Alert</li></ul> |

## Confederates and Standardized Patients

| Confederate and Standardized Patient Roles and Scripts |                                                                                                     |
|--------------------------------------------------------|-----------------------------------------------------------------------------------------------------|
| <i>Standardized Patient</i>                            | Initially, the patient is asymptomatic, and while sitting in the hyperbaric chamber, has a seizure. |
| <i>Confederate</i>                                     | Confederates assist him, and they lay him on the ground and put him in Lateral Safety Position.     |

## Scenario Progression

| Scenario States, Modifiers, and Triggers |                                                                                                                                                                                                |                                                                                                                                                                                                                      |                                                                                                                   |                                                                                                 |
|------------------------------------------|------------------------------------------------------------------------------------------------------------------------------------------------------------------------------------------------|----------------------------------------------------------------------------------------------------------------------------------------------------------------------------------------------------------------------|-------------------------------------------------------------------------------------------------------------------|-------------------------------------------------------------------------------------------------|
| Patient State/Vitals                     | Patient Status                                                                                                                                                                                 | Learner Actions, Modifiers & Triggers to Move to Next State                                                                                                                                                          |                                                                                                                   | Facilitator Notes                                                                               |
| <b>1. Baseline State</b>                 | Initially asymptomatic; after virtual 30 minutes (reality: 2 minutes), the patient says feeling like numbness in the fingers<br><br>Then loss of consciousness and generalized clonic seizure. | <u>Expected Learner Actions:</u><br><br>put the patient on the floor, remove O2 mask, check carotid pulse, call technician outside asking to stop O2 flow and restore ambient air concentrations inside the chamber. | <u>Modifiers and triggers</u><br><br>Stop O2--> seizures stop (2)<br><br>O2 not stopped --> seizures continue (3) | Confederates assist him, and they lay him on the ground and put him in Lateral Safety Position. |

|                                                          |                                                                                            |                                                                                                                                                                                                                                   |                                                                                                                                                              |          |
|----------------------------------------------------------|--------------------------------------------------------------------------------------------|-----------------------------------------------------------------------------------------------------------------------------------------------------------------------------------------------------------------------------------|--------------------------------------------------------------------------------------------------------------------------------------------------------------|----------|
| <p><b>2.</b></p> <p>FR 18</p> <p>GCS: 9<br/>(E2V2M5)</p> | <p>Cessation of seizures after 1 minute; patient still unconscious, breathing heavily.</p> | <p><u>Expected Learner Actions</u></p> <p>Trainees ask the technician to slowly decompress chamber to surface (to avoid PNx) -&gt; end scenario</p>                                                                               | <p><u>Modifiers and triggers</u></p> <p>Fast decompression --&gt; PNx, stop scenario</p> <p>If they don't stop O2 within 2 minutes --&gt; stop scenario.</p> | <p>-</p> |
| <p><b>3.</b></p>                                         | <p>Generalized clonic seizure</p>                                                          | <p><u>Expected Learner Actions</u></p> <p>put the patient on the floor, remove oxygen mask, check carotid pulse, call technician outside asking to stop oxygen flow and restore ambient air concentrations inside the chamber</p> |                                                                                                                                                              |          |

## Facilitator Cheat Sheet & Debriefing Tips

- The facilitator asks the team, "How did you feel? What are the emotions you felt?"
- Brief Case Summary
- The facilitator invites the team to produce a "Plus/Delta/Solutions" chart describing: "what went well" (Plus); "what could be improved" (Delta); "what we will do next time" (Solutions).
- To help the team, the facilitator asks questions such as: "What actions or things would you perform again in the same clinical case in reality tomorrow"?
- Address the critical points (e.g., assessing the patient's level of consciousness, decompression when necessary, assessing possible causes of illness, etc.).
- Discuss errors or lack of actions and reflect on the causes to find solutions
- Conclusions on positive things done and answers found to possible errors

## References

1. Paganini M, Camporesi E. Side Effects of Hyperbaric Oxygen Therapy. In: Moon RE, ed. *Hyperbaric Oxygen Therapy Indications*. 14 th ed. North Palm Beach, FL, USA: Best Publishing Company; 2019: 335-339.
2. Jain KK. "Indications, contraindications, and complications of HBO therapy". In: Jain KK, ed. *Textbook of Hyperbaric Medicine*. 6th ed. Cham: Springer International Publishing AG (2017). p. 89-84.
